# Supplementary material for: Predector: an automated and combinative method for the predictive ranking of candidate effector proteins of fungal plant-pathogens
Source: Research Square preprint supplement (doi:10.21203/rs.3.rs-379941/v1), 2021-04-01
Supplement: Supplementary file 1 [file 5bddb2576f4df6bc8e6372ac.xlsx]

## Sheet: unconventional_effectors
Feature type	Effector name(s)	Citation
large-size	AvrSr35	Salcedo et al. 2017. DOI: 10.1126/science.aao7294
large-size	PGTG_10537.2, PGTG_16791	Nirmala et al. 2011. DOI: 10.1073/pnas.1111771108
large-size	Cgfl	Sanz-Martín et al. 2016. DOI: 10.1111/mpp.12347
low cysteine count	Eff1-1	Khrunyk et al. 2010. DOI: 10.1111/j.1469-8137.2010.03413.x
low cysteine count	EP1	Vargas et al. 2016. DOI: 10.1094/MPMI-09-15-0209-R
low cysteine count	SsSSITL	Zhu et al. 2013. DOI: 10.1371/journal.pone.0053901
low cysteine count	AvrSr50	Chen et al. 2017. DOI: 10.1126/science.aao4810
low cysteine count	Pit2	Schweizer et al. 2018. DOI: 10.1093/gbe/evy023
low cysteine count	MoBas1	Khang et al. 2010. DOI: 10.1105/tpc.109.069666
low cysteine count	Iug9	Dong et al. 2015. DOI: 10.1371/journal.ppat.1004801
low cysteine count	ROPIP1	Nottensteiner et al. 2018. DOI: 10.1093/jxb/ery174
low cysteine count	AvrPib	Zhang et al. 2015. DOI: 10.1038/srep11642
low cysteine count	CgDN3	Stephenson et al. 2000. DOI: 10.1094/MPMI.2000.13.9.929
low cysteine count	MiSSP7	Plett et al. 2014. DOI: 10.1073/pnas.1322671111
low cysteine count	AvrM	Catanzariti et al. 2006. DOI: 10.1105/tpc.105.035980
low cysteine count	AvrLm1	Gout et al. 2006. DOI: 10.1111/j.1365-2958.2006.05076.x
low cysteine count	Uh-Avr1	Laurie et al. 2012. DOI: 10.1105/tpc.112.097261
low cysteine count	Vdlsc1	Liu et al. 2014. DOI: 10.1038/ncomms5686
low cysteine count	AvrM14	Anderson et al. 2016. DOI: 10.1186/s12864-016-3011-9
low cysteine count	NIS1	Yoshino et al. 2012. DOI: 10.1094/MPMI-12-11-0316
low cysteine count	See1	Redkar et al. 2015. DOI: 10.1105/tpc.114.131086
low cysteine count	AvrL567	Dodds et al. 2004. DOI: 10.1105/tpc.020040
low cysteine count	AVRA13	Lu et al. 2016. DOI: 10.1073/pnas.1612947113
low cysteine count	BEC3	Schmidt et al. 2014. DOI: 10.1111/mpp.12110
low cysteine count	BEC1019	Zhang et al. 2019. DOI: 10.3390/ijms20184376
low cysteine count	XYLA	Pollet et al. 2009. DOI: 10.1016/j.enzmictec.2008.12.005
non-classically secreted	Vdlsc1	Liu et al. 2014. DOI: 10.1038/ncomms5686
non-classically secreted	EKA effectors	Ridout et al. 2006. DOI: 10.1105/tpc.106.043307
